# Supplementary material for: Prevalent lightning sferics at 600 megahertz near Jupiter’s poles
Source: Springer Nature journal article supplement (doi:10.1038/s41586-018-0156-5), 2018-05-25
Supplement: MOESM1 [file 41586_2018_156_MOESM1_ESM.csv]

Planetocentric Latitude (deg)	West Longitude (deg)	Minimum Effective Isotropic Radiating Power (W)
86.897	288.9	144.87
50.676	68.872	220.11
65.991	257.46	137.56
61.891	257.2	180.17
81.549	267.61	84.032
72.569	261.32	459.48
87.941	327.59	61.53
83.643	276.63	84.926
50.418	77.1	37.461
82.714	67.066	53.055
70.211	80.864	73.354
45.733	84.941	10.099
44.573	84.977	13.6
41.493	85.06	6.993
47.54	86.195	48.285
43.984	86.632	5.6707
44.696	87.277	72.73
44.257	87.288	43.539
40.513	88.697	7.5918
42.576	89.002	7.0242
39.41	89.048	16.851
38.93	89.054	5.9391
36.957	89.075	7.9065
9.0312	92.949	3.8436
-58.33	106.14	33.733
-68.405	105.37	39.388
-59.413	115.21	68.105
-64.715	114.68	127.6
-65.264	117.74	179.14
-70.115	302.61	292.83
-73.702	303.46	197.09
75.182	317.17	229.22
81.501	325.68	114.85
70.919	328.57	1113.3
75.715	337.34	80.12
63.346	334.31	123.27
68.491	338.05	41.883
67.615	337.49	97.423
49.862	331.42	273.58
51.742	335.76	90.988
63.554	342.39	39.835
49.714	336.78	115.4
61.55	343.15	60.971
47.643	337.76	914.75
56.636	343.3	42.354
42.651	340.86	472.45
64.559	352.41	49.864
41.905	342.08	514.16
44.066	343.37	435.09
42.844	343.03	185.1
40.662	343.84	119.06
33.666	342.26	81.494
37.019	346.29	59.349
33.577	346.13	47.27
59.16	358.22	29.626
31.334	346.29	55.804
45.793	351.15	17.536
41.998	349.76	45.938
30.472	347.37	90.514
29.125	358.56	21.122
21.917	1.2654	4.8925
23.863	2.7005	1.4208
-12.451	9.6929	8.4929
-37.248	25.45	40.853
-47.298	30.682	181.76
-70.645	149.37	177.74
63.196	248.56	163.33
59.718	249.63	101.31
74.519	249.2	122.89
73.569	249.32	63.061
51.821	254.76	264.9
50.553	254.79	43.473
85.377	82.227	90.587
66.066	254.81	78.191
59.855	256.94	151.71
49.969	257.55	167.32
44.767	257.67	94.066
69.388	258.85	33.265
49.174	260.31	477.49
77.166	258.84	336.8
59.926	262.71	44.922
63.94	263.76	34.689
52.658	265.38	20.691
53.393	265.66	46.408
47.567	266.11	9.9075
19.211	269.66	6.0275
35.52	269.98	7.1382
16.439	270.6	3.4865
16.177	270.91	3.1464
10.601	273.39	1.3311
-17.346	281.89	3.2239
-15.01	282.16	5.1729
-17.194	282.5	6.232
-18.595	282.52	9.1763
-14.367	282.77	6.7189
-16.25	282.79	78.669
-16.651	282.8	5.9272
-10.35	283.03	12.308
-17.434	283.11	11.035
-17.751	283.42	11.022
-18.461	283.74	7.4532
-16.165	284.02	9.7854
-14.961	284.31	16.033
-19.255	284.36	152.27
-23.973	284.73	9.1698
-20.951	285.3	11.052
-22.7	285.32	14.611
-46.951	285.77	22.953
-19.783	286.21	47.74
-47.744	286.7	26.096
-48.367	286.71	30.45
-19.024	286.81	26.407
-58.748	288.57	43.524
-25.078	288.11	34.729
-58.69	291	28.926
-45.499	291.21	123.46
-74.358	293.11	106.55
-31.344	291.88	79.47
-60.136	293.51	52.254
-72.732	295.95	73.895
-87.771	310.4	111.98
-36.831	296.89	85.592
-83.456	112.19	294.3
-89.056	339.3	144.79
-88.846	85.206	145.35
-70.015	300.28	61.234
-67.978	120.36	304.29
76.738	265.03	244.92
77.563	243.93	172.18
69.876	298.52	334.61
70.089	198.26	733.73
70.227	298.84	159.9
75.939	278.87	114
70.347	198.35	133.6
76.242	278.8	133.13
68.416	194.51	211.64
72.158	296.66	125.49
77.851	231.98	384.94
75.451	286.69	293.08
78.494	257.99	189.75
77.603	226.58	184.98
74.03	293.73	248.37
78.141	230.43	136.47
79.114	265.19	113.68
65.226	188.92	97.306
78.084	221.51	263.89
53.586	182.47	206.47
74.838	299.3	100.77
80.101	264.64	74.269
79.914	235.05	349.12
79.577	229.95	83.319
70.698	310.53	680.66
66.962	189.16	343.18
73.92	199.07	193.52
80.937	244.44	507.41
81.031	271.3	341.82
81.466	257.55	52.756
59.801	183.58	48.817
58.62	183.15	95.615
77.859	301.13	272.28
71.606	192.08	59.208
66.575	186.7	79.212
81.823	229.14	173.51
82.139	230.16	313.63
69.073	187.58	48.701
82.359	285.13	141.75
76.003	195.54	65.613
57.76	181.87	53.665
44.45	180.49	78.961
82.341	292.49	114.76
80.422	207.04	81.416
59.349	181.9	69.975
83.151	286.89	592.84
82.536	219.21	30.772
54.536	180.93	47.467
61.244	181.96	61.128
80.491	311.68	122.28
84.469	244.14	71.322
81.736	308.25	86.143
84.355	233.17	64.195
80.26	200.34	47.564
73.388	187.52	95.891
44.785	180.29	78.222
54.01	180.38	92.424
71.407	184.79	236.69
70.794	184.41	53.655
85.095	231.51	44.488
57.585	180.19	29.134
54.804	180.02	33.681
62.471	180.53	24.732
82.895	200.29	125.31
56.038	179.76	36.46
85.069	212.25	248.28
49.697	179.54	36.975
48.597	179.49	60.321
50.543	179.15	82.172
68.413	178.49	23.746
55.612	177.96	55.681
56.256	177.69	20.017
46.127	177.7	7.531
-56.438	196.8	24.075
-51.864	195.83	21.577
-49.084	194.48	64.434
-62.745	195.47	54.143
-65.259	193.54	60.247
-72.209	186.18	66.041
-72.431	184.04	49.375
-70.372	180.57	92.66
-55.908	189.5	88.237
60.383	103.76	63.345
45.859	105.4	119.59
69.871	110.7	133.11
49.778	109.96	50.738
48.254	109.8	85.887
58.688	112.01	49.157
48.672	110.56	300.65
46.403	111.7	59.741
64.438	116.14	48.047
51.782	113.17	259.11
41.533	111.83	92.89
47.086	113.19	60.472
68.646	121.08	192.95
59.324	117.19	62.699
49.688	115.75	45.463
42.081	114.56	141.97
40.276	114.33	122.65
60.813	119.39	33.432
42.489	115.28	64.853
56.94	119.78	23.052
47.521	117.49	32.128
77.714	139.36	63.975
45.447	117.8	69.929
40.406	116.97	130.58
77.39	140.29	36.295
47.05	119.5	173.82
45.139	119.8	36.369
67.355	129.68	77.351
57.437	124	32.104
55.625	123.33	25.161
55.158	123.16	225.53
50.486	121.75	37.469
46.534	120.79	107.62
44.07	120.27	20.088
41.036	119.7	48.071
39.833	119.5	63.451
46.918	121.57	77.889
42.045	120.55	77.46
52.476	123.81	34.517
50.914	124.06	13.882
47.316	123.06	48.608
42.567	121.98	207.51
38.746	121.25	128.55
43.75	122.9	159.44
45.197	123.92	215.62
44.614	123.78	127.25
41.976	123.18	106.01
55.989	128.2	31.393
32.273	122.08	40.817
68.62	138.5	36.728
49.007	126.36	79.493
47.404	125.88	11.001
46.98	125.76	24.666
39.818	124.04	19.943
44.08	125.67	164.34
54.38	129.81	8.4731
53.395	129.39	6.499
58.802	132.89	29.328
47.012	127.84	39.694
46.672	127.74	22.946
44.487	127.11	9.168
44.091	127.01	92.083
48.659	129.06	10.876
44.836	127.88	66.899
41.88	127.75	27.693
44.413	129.75	7.1318
33.588	136	5.969
33.066	135.87	7.8475
33.944	136.65	3.2304
33.712	136.59	43.011
36.748	137.98	8.7337
31.753	137.23	21.312
31.198	137.65	5.3629
30.116	137.94	12.54
29.794	138.94	4.3682
26.983	138.86	7.0244
-46.442	159.61	45.517
-68.499	192.99	132.03
84.47	228.09	140.99
62.748	20.173	197.56
83.86	226.83	229.8
68.115	211.49	164.03
79.203	218.63	83.962
79.363	16.526	107.74
77.081	218.47	424.44
78.551	219.78	425.56
86.687	251.18	82.922
70.608	215.97	154.85
73.902	217.98	87.083
80.981	224.42	71.176
86.421	356.6	103.97
63.785	35.324	32.683
-56.475	65.835	32.001
-47.115	65.452	355.72
-54.613	66.216	134.14
-49.058	65.935	83.297
-75.799	83.224	120.63
-68.417	82.119	205.46
63.344	248.9	156.75
77.727	225.85	122.74
62.249	103.89	181.84
79.889	247.17	70.424
55.94	266.38	361.55
57.199	268.31	153.15
68.328	269.08	73.075
63.749	269.81	102.77
59.571	275.8	243.27
49.212	277.29	135.86
79.875	287.92	63.809
65.997	286.62	447.88
62.108	285.36	56.793
66.999	288.38	1805.7
55.17	286.85	61.824
69.184	293.94	55.506
64.918	291.38	176.91
60.843	289.63	205.6
66.211	294.75	69.52
63.268	293.07	63.303
62.651	292.77	51.908
72.076	301.53	29.513
48.272	289.11	59.197
70.199	301.01	83.328
64.94	296.58	45.055
62.166	294.94	98.903
72.509	305.66	29.213
68.369	300.69	25.179
63.217	296.76	22.728
72.825	311.74	23.893
64.52	301.48	16.31
66.378	307.29	23.358
78.819	348.99	54.859
59.064	306.91	26.547
57.435	307.92	91.006
54.096	306.76	10.837
54.421	307.97	44.284
52.178	306.63	18.225
51.852	306.45	23.89
57.624	311.35	58.325
57.141	312.04	33.638
56.792	311.76	7.1664
54.507	310.06	13.92
55.264	311.63	40.149
54.94	311.39	34.193
52.215	309.57	66.646
68.077	330.12	26.851
66.961	327.57	165.89
57.211	314.27	48.931
53.149	311.15	13.364
50.8	311.56	6.0561
57.175	319.71	36.513
9.2384	321.91	5.5829
9.0682	321.89	4.853
8.7131	322.87	10.067
7.8235	322.77	3.6154
-32.177	338.77	7.7393
-36.038	341.32	11.954
-49.368	351.05	25.255
-43.789	346.73	34.643
-48.748	351.27	58.176
-40.655	345.49	20.566
-52.745	357.24	95.072
-41.396	347.22	60.375
-48.063	353.01	37.714
-46.264	352.97	211.8
-55.127	3.1005	41.394
-35.173	346.88	53.883
-58.175	9.0375	114.93
-66.711	39.859	78.36
