# Supplementary material for: Prevalent lightning sferics at 600 megahertz near Jupiter’s poles
Source: Springer Nature journal article supplement (doi:10.1038/s41586-018-0156-5), 2018-05-25
Supplement: MOESM2 [file 41586_2018_156_MOESM2_ESM.xlsx]

## Sheet: MWR_data
Planetocentric Latitude (deg)	MWR weighted detection frequency
-87.75	0.074031
-87.25	0.06604
-86.75	0.05919
-86.25	0.053279
-85.75	0.048179
-85.25	0.04345
-84.75	0.039261
-84.25	0.035545
-83.75	0.0323
-83.25	0.02958
-82.75	0.027217
-82.25	0.026226
-81.75	0.024762
-81.25	0.023671
-80.75	0.022929
-80.25	0.022584
-79.75	0.022501
-79.25	0.022704
-78.75	0.024061
-78.25	0.024922
-77.75	0.025828
-77.25	0.026878
-76.75	0.028117
-76.25	0.02948
-75.75	0.031111
-75.25	0.032473
-74.75	0.033699
-74.25	0.034887
-73.75	0.035895
-73.25	0.036835
-72.75	0.037735
-72.25	0.038398
-71.75	0.039041
-71.25	0.039379
-70.75	0.039609
-70.25	0.039538
-69.75	0.03934
-69.25	0.03911
-68.75	0.038744
-68.25	0.03856
-67.75	0.038284
-67.25	0.037941
-66.75	0.037529
-66.25	0.037111
-65.75	0.036672
-65.25	0.036263
-64.75	0.036016
-64.25	0.035538
-63.75	0.035217
-63.25	0.035008
-62.75	0.03488
-62.25	0.034825
-61.75	0.034897
-61.25	0.034918
-60.75	0.034901
-60.25	0.035072
-59.75	0.034973
-59.25	0.034776
-58.75	0.034641
-58.25	0.034215
-57.75	0.033869
-57.25	0.03305
-56.75	0.032289
-56.25	0.031478
-55.75	0.030711
-55.25	0.029948
-54.75	0.029348
-54.25	0.028876
-53.75	0.02875
-53.25	0.028848
-52.75	0.029302
-52.25	0.030033
-51.75	0.031032
-51.25	0.032328
-50.75	0.033713
-50.25	0.035883
-49.75	0.037826
-49.25	0.0396
-48.75	0.040587
-48.25	0.040782
-47.75	0.040999
-47.25	0.039519
-46.75	0.037997
-46.25	0.034782
-45.75	0.031487
-45.25	0.027812
-44.75	0.024207
-44.25	0.021214
-43.75	0.018989
-43.25	0.017263
-42.75	0.01609
-42.25	0.01502
-41.75	0.014582
-41.25	0.014074
-40.75	0.013426
-40.25	0.012657
-39.75	0.011671
-39.25	0.010605
-38.75	0.0097285
-38.25	0.0093008
-37.75	0.0093579
-37.25	0.0096923
-36.75	0.010414
-36.25	0.01068
-35.75	0.010554
-35.25	0.010195
-34.75	0.0092651
-34.25	0.0085685
-33.75	0.0086678
-33.25	0.0090741
-32.75	0.010052
-32.25	0.010339
-31.75	0.010009
-31.25	0.0088412
-30.75	0.00738
-30.25	0.0058619
-29.75	0.0047824
-29.25	0.0041462
-28.75	0.0038414
-28.25	0.0037191
-27.75	0.0037428
-27.25	0.0039379
-26.75	0.0044444
-26.25	0.0053241
-25.75	0.007047
-25.25	0.0089052
-24.75	0.011132
-24.25	0.012766
-23.75	0.013662
-23.25	0.014438
-22.75	0.014592
-22.25	0.014608
-21.75	0.014659
-21.25	0.015131
-20.75	0.016421
-20.25	0.019444
-19.75	0.023767
-19.25	0.030715
-18.75	0.037133
-18.25	0.045433
-17.75	0.051413
-17.25	0.053167
-16.75	0.051697
-16.25	0.04627
-15.75	0.041391
-15.25	0.036504
-14.75	0.032041
-14.25	0.028476
-13.75	0.02558
-13.25	0.022199
-12.75	0.019837
-12.25	0.01747
-11.75	0.015072
-11.25	0.012318
-10.75	0.010465
-10.25	0.0085775
-9.75	0.0073419
-9.25	0.0063891
-8.75	0.0058245
-8.25	0.0051707
-7.75	0.0047784
-7.25	0.0044112
-6.75	0.0042166
-6.25	0.0040247
-5.75	0.0038744
-5.25	0.0034866
-4.75	0.0032456
-4.25	0.0031874
-3.75	0.0031983
-3.25	0.0031561
-2.75	0.0032712
-2.25	0.0019042
-1.75	0.001859
-1.25	0.001784
-0.75	0.0017358
-0.25	0.0019873
0.25	0.0011456
0.75	0.0011386
1.25	0.00094632
1.75	0.00032426
2.25	0.0001184
2.75	0.00014311
3.25	0.00016726
3.75	0.00023678
4.25	0.00039501
4.75	0.00054146
5.25	0.00080191
5.75	0.0010752
6.25	0.0021642
6.75	0.005028
7.25	0.0094981
7.75	0.013767
8.25	0.021676
8.75	0.033343
9.25	0.03644
9.75	0.035176
10.25	0.035631
10.75	0.030823
11.25	0.012752
11.75	0.0056876
12.25	0.0050685
12.75	0.0048422
13.25	0.0053245
13.75	0.0062643
14.25	0.0075482
14.75	0.0089422
15.25	0.010492
15.75	0.012752
16.25	0.013326
16.75	0.016107
17.25	0.01565
17.75	0.013057
18.25	0.010574
18.75	0.010516
19.25	0.0097399
19.75	0.011412
20.25	0.013314
20.75	0.014585
21.25	0.016387
21.75	0.019454
22.25	0.017823
22.75	0.016913
23.25	0.021571
23.75	0.029195
24.25	0.025327
24.75	0.017507
25.25	0.01563
25.75	0.017056
26.25	0.019339
26.75	0.021143
27.25	0.022899
27.75	0.0247
28.25	0.027544
28.75	0.031332
29.25	0.033883
29.75	0.036012
30.25	0.039114
30.75	0.042377
31.25	0.04295
31.75	0.043728
32.25	0.048596
32.75	0.061524
33.25	0.069498
33.75	0.069642
34.25	0.060359
34.75	0.052441
35.25	0.047209
35.75	0.046387
36.25	0.04768
36.75	0.050074
37.25	0.053343
37.75	0.055651
38.25	0.058511
38.75	0.061958
39.25	0.065243
39.75	0.069626
40.25	0.074503
40.75	0.079184
41.25	0.084096
41.75	0.089383
42.25	0.096705
42.75	0.1044
43.25	0.11328
43.75	0.12307
44.25	0.13041
44.75	0.13707
45.25	0.13967
45.75	0.13885
46.25	0.13588
46.75	0.13007
47.25	0.12362
47.75	0.11689
48.25	0.11049
48.75	0.10446
49.25	0.099694
49.75	0.096972
50.25	0.096363
50.75	0.097402
51.25	0.10021
51.75	0.10417
52.25	0.10853
52.75	0.11299
53.25	0.11763
53.75	0.1214
54.25	0.12543
54.75	0.12819
55.25	0.12991
55.75	0.13068
56.25	0.13054
56.75	0.1295
57.25	0.12706
57.75	0.1238
58.25	0.11862
58.75	0.11321
59.25	0.10845
59.75	0.1042
60.25	0.10078
60.75	0.0986
61.25	0.097235
61.75	0.097143
62.25	0.097693
62.75	0.099096
63.25	0.10066
63.75	0.10253
64.25	0.10443
64.75	0.10617
65.25	0.1076
65.75	0.10887
66.25	0.10968
66.75	0.11022
67.25	0.11045
67.75	0.11033
68.25	0.11024
68.75	0.10948
69.25	0.10849
69.75	0.10772
70.25	0.10672
70.75	0.1056
71.25	0.10429
71.75	0.1025
72.25	0.10053
72.75	0.098797
73.25	0.097075
73.75	0.095533
74.25	0.09429
74.75	0.093406
75.25	0.093076
75.75	0.093189
76.25	0.093661
76.75	0.09439
77.25	0.095495
77.75	0.096561
78.25	0.097752
78.75	0.098644
79.25	0.099348
79.75	0.099651
80.25	0.099458
80.75	0.098754
81.25	0.09751
81.75	0.095631
82.25	0.092933
82.75	0.08978
83.25	0.085139
83.75	0.080938
84.25	0.076625
84.75	0.071905
85.25	0.067532
85.75	0.063726
86.25	0.060742
86.75	0.058256
87.25	0.056357
87.75	0.055159

## Sheet: Waves_data
Planetocentric Latitude (deg)	Waves detection frequency
-87.5	0.0094098
-82.5	0.0015723
-77.5	0.012154
-72.5	0.10194
-67.5	0.13002
-62.5	0.43835
-57.5	0.56276
-52.5	0.58027
-47.5	0.42459
-42.5	0.31333
-37.5	0.11638
-32.5	0.036699
-27.5	0.007614
-22.5	0
-17.5	0
-12.5	0
-7.5	0
-2.5	0
2.5	0
7.5	0
12.5	0.022244
17.5	0.036933
22.5	0.074414
27.5	0.22701
32.5	0.44875
37.5	0.56124
42.5	0.93006
47.5	1.2737
52.5	1.3157
57.5	0.56776
62.5	0.76417
67.5	0.55051
72.5	0.254
77.5	0.093698
82.5	0.044739
87.5	0
